# Supplementary material for: dSTIM- and Ral/Exocyst-Mediated Synaptic Release from Pupal Dopaminergic Neurons Sustains Drosophila Flight
Source: eNeuro. 2018 Jun 18;5(3):ENEURO.0455-17.2018. doi: 10.1523/ENEURO.0455-17.2018 (PMC6011419; doi:10.1523/ENEURO.0455-17.2018)
Supplement: Table 1-1 — Statistical tests and p-values for all figures. Download Table 1-1, XLSX file. [file sup_enu-eN-NWR-0455-17-s07.xlsx]

## Sheet: Fig. 1
1A		two tailed unpaired t-test			8.1395e-08
1B		two tailed unpaired t-test			1.01483e-07
1C		two tailed unpaired t-test			1.53032e-11
1D	Larval	two tailed unpaired t-test			0.725773
	Pupal	two tailed unpaired t-test			3.6304e-11
	Adult	two tailed unpaired t-test			0.437544

## Sheet: Fig. 2
2B	two tailed unpaired t-test				0.0151228
2D	one-way ANOVA with post hoc Tukey's test					ANOVA
							DF	Sum of Squares	Mean Square	F Value	Prob>F
						Model	2	3713350000	1856670000	7.46886	0.000757462
						Error	187	46486100000	248589000
						Total	189	50199400000
						Tukey's test
							MeanDiff	SEM	q Value	Prob	Alpha	Sig	LCL	UCL
						Level2 Level1	-8721.2	2517.92	4.89835	0.0019	0.05	1	-14669.8	-2772.55
						Level3 Level1	-9677.24	3286.93	4.16367	0.01016	0.05	1	-17442.7	-1911.79
						Level3 Level2	-956.047	3256.07	0.41524	0.9536	0.05	0	-8648.6	6736.5
2F	one-way ANOVA with post hoc Tukey's test					ANOVA
							DF	Sum of Squares	Mean Square	F Value	Prob>F
						Model	3	2455710000	818569000	7.0615	0.000128427
						Error	342	39644700000	115920000
						Total	345	42100400000
						Tukey's test
							MeanDiff	SEM	q Value	Prob	Alpha	Sig	LCL	UCL
						Level2 Level1	-1875.66	1807.75	1.46734	0.72749	0.05	0	-6542.73	2791.41
						Level3 Level1	-7321.84	1695.6	6.10678	0.000121017	0.05	1	-11699.4	-2944.3
						Level3 Level2	-5446.18	1668.23	4.6169	0.0066	0.05	1	-9753.07	-1139.3
						Level4 Level1	-3402.29	1662.34	2.89446	0.17309	0.05	0	-7693.96	889.38
						Level4 Level2	-1526.63	1634.41	1.32095	0.78657	0.05	0	-5746.21	2692.95
						Level4 Level3	3919.55	1509.44	3.67227	0.04807	0.05	1	22.6137	7816.49

## Sheet: Fig. 3
3A	one-way ANOVA with post hoc Tukey's test					ANOVA	DF	Sum of Squares	Mean Square	F Value	Prob>F
						Model	4	2804890	701222	16.947	1.05949e-12
						Error	346	14316600	41377.5
						Total	350	17121500
						Tukey's test
							MeanDiff	SEM	q Value	Prob	Alpha	Sig	LCL	UCL
						Level2 Level1	-190.202	29.2448	9.19775	5.44122e-09	0.05	1	-270.398	-110.007
						Level3 Level1	-169.274	47.2087	5.07089	0.00351	0.05	1	-298.731	-39.8176
						Level3 Level2	20.928	45.5491	0.64977	0.9908	0.05	0	-103.978	145.834
						Level4 Level1	-161.753	30.8927	7.40475	2.83853e-06	0.05	1	-246.467	-77.0381
						Level4 Level2	28.4497	28.2916	1.42212	0.85273	0.05	0	-49.132	106.031
						Level4 Level3	7.52174	46.6242	0.22815	0.99985	0.05	0	-120.332	135.376
						Level5 Level1	34.4185	41.0709	1.18515	0.9186	0.05	0	-78.2069	147.044
						Level5 Level2	224.621	39.1519	8.11358	2.15065e-07	0.05	1	117.258	331.984
						Level5 Level3	203.693	53.9099	5.34346	0.00173	0.05	1	55.8601	351.526
						Level5 Level4	196.171	40.3976	6.86743	1.79057e-05	0.05	1	85.3919	306.95
3B			Pupal	two tailed unpaired t-test			0.0114001
			Adult	two tailed unpaired t-test			0.521036
3C	one-way ANOVA with post hoc Tukey's test					ANOVA	DF	Sum of Squares	Mean Square	F Value	Prob>F
						Model	4	947332	236833	15.1045	1.03703e-10
						Error	186	2916410	15679.6
						Total	190	3863740
						Tukey's test
							MeanDiff	SEM	q Value	Prob	Alpha	Sig	LCL	UCL
						Level2 Level1	-133.649	24.7669	7.63149	2.04682e-06	0.05	1	-201.875	-65.4231
						Level3 Level1	-168.601	27.9231	8.53908	9.12688e-08	0.05	1	-245.521	-91.6802
						Level3 Level2	-34.9515	29.6481	1.66719	0.76346	0.05	0	-116.624	46.7208
						Level4 Level1	-173.189	28.9443	8.46202	1.18374e-07	0.05	1	-252.923	-93.456
						Level4 Level2	-39.5404	30.6118	1.8267	0.69668	0.05	0	-123.867	44.7866
						Level4 Level3	-4.58889	33.2172	0.19537	0.99992	0.05	0	-96.093	86.9153
						Level5 Level1	-83.9327	28.2439	4.20263	0.0274	0.05	1	-161.737	-6.1285
						Level5 Level2	49.7163	29.9505	2.34752	0.46133	0.05	0	-32.789	132.222
						Level5 Level3	84.6678	32.6088	3.67197	0.07513	0.05	0	-5.16029	174.496
						Level5 Level4	89.2567	33.4874	3.76942	0.06313	0.05	0	-2.99173	181.505
3D	one-way ANOVA with post hoc Tukey's test					ANOVA	DF	Sum of Squares	Mean Square	F Value	Prob>F
						Model	4	1289520	322379	5.91222	0.000193592
						Error	147	8015560	54527.6
						Total	151	9305080
						Tukey's test
							MeanDiff	SEM	q Value	Prob	Alpha	Sig	LCL	UCL
						Level2 Level1	-161.978	57.9889	3.95027	0.04601	0.05	1	-322.139	-1.81749
						Level3 Level1	1.29303	60.1938	0.03038	1	0.05	0	-164.958	167.544
						Level3 Level2	163.271	61.4695	3.75634	0.0657	0.05	0	-6.50265	333.045
						Level4 Level1	35.1555	59.5917	0.8343	0.9764	0.05	0	-129.432	199.743
						Level4 Level2	197.134	60.88	4.57932	0.01274	0.05	1	28.988	365.279
						Level4 Level3	33.8624	62.9838	0.76033	0.98327	0.05	0	-140.094	207.819
						Level5 Level1	-184.215	57.513	4.52975	0.0142	0.05	1	-343.061	-25.3688
						Level5 Level2	-22.2369	58.8468	0.5344	0.99563	0.05	0	-184.767	140.293
						Level5 Level3	-185.508	61.0207	4.29933	0.02311	0.05	1	-354.043	-16.9737
						Level5 Level4	-219.371	60.4269	5.13409	0.00353	0.05	1	-386.265	-52.4764

## Sheet: Fig. 4
4E	one-way ANOVA with post hoc Tukey's test				ANOVA	DF	Sum of Squares	Mean Square	F Value	Prob>F
					Model	6	5495.14	915.857	10.4653	1.51407e-10
					Error	301	26341.7	87.514
					Total	307	31836.9
					Tukey's test
						MeanDiff	SEM	q Value	Prob	Alpha	Sig	LCL
					RalDN control	-10.6701	2.28647	6.59959	9.37231e-05	0.05	1	-17.4572
					Exo84IR control	-5.8959	2.25904	3.69098	0.12663	0.05	0	-12.6017
					Exo84IR RalDN	4.77416	2.57044	2.62666	0.51042	0.05	0	-2.856
					Sec5IR control	-9.02056	1.78549	7.14482	1.56774e-05	0.05	1	-14.3206
					Sec5IR RalDN	1.6495	2.16608	1.07694	0.9883	0.05	0	-4.78033
					Sec5IR Exo84IR	-3.12466	2.13711	2.06772	0.76701	0.05	0	-9.46849
					Sec6IR control	-6.97966	1.73594	5.68609	0.00142	0.05	1	-12.1327
					Sec6IR RalDN	3.6904	2.12542	2.45551	0.59217	0.05	0	-2.61875
					Sec6IR Exo84IR	-1.08376	2.09589	0.73127	0.9986	0.05	0	-7.30524
					Sec6IR Sec5IR	2.0409	1.574	1.83372	0.85318	0.05	0	-2.63139
					dStimIR control	-6.73057	2.23327	4.26212	0.04396	0.05	1	-13.3599
					dStimIR RalDN	3.93948	2.54783	2.18668	0.71652	0.05	0	-3.62353
					dStimIR Exo84IR	-0.83467	2.52324	0.46781	0.99989	0.05	0	-8.32472
					dStimIR Sec5IR	2.28999	2.10985	1.53496	0.93208	0.05	0	-3.97293
					dStimIR Sec6IR	0.24909	2.06809	0.17033	1	0.05	0	-5.88987
					Rescue control	2.3655	2.04083	1.63919	0.90872	0.05	0	-3.69255
					Rescue RalDN	13.0356	2.38095	7.74273	1.9205e-06	0.05	1	5.9679
					Rescue Exo84IR	8.2614	2.35463	4.96189	0.00928	0.05	1	1.27189
					Rescue Sec5IR	11.3861	1.90499	8.45272	1.45244e-07	0.05	1	5.73127
					Rescue Sec6IR	9.34516	1.85863	7.11065	1.7595e-05	0.05	1	3.82797
					Rescue dStimIR	9.09607	2.32991	5.52114	0.00222	0.05	1	2.17991
4F	one-way ANOVA with post hoc Tukey's test				ANOVA	DF	Sum of Squares	Mean Square	F Value	Prob>F
					Model	6	79315.4	13219.2	12.9081	5.51004e-13
					Error	301	308256	1024.11
					Total	307	387572
					Tukey's test
						MeanDiff	SEM	q Value	Prob	Alpha	Sig	LCL	UCL
					RalDN control	-38.1763	7.82165	6.90257	3.52202e-05	0.05	1	-61.3943	-14.9584
					Exo84IR control	-26.9921	7.72783	4.93962	0.00979	0.05	1	-49.9315	-4.05265
					Exo84IR RalDN	11.1843	8.7931	1.79879	0.86429	0.05	0	-14.9174	37.2859
					Sec5IR control	-33.0279	6.10789	7.64725	2.70905e-06	0.05	1	-51.1587	-14.8972
					Sec5IR RalDN	5.14842	7.40983	0.98261	0.99282	0.05	0	-16.847	27.1439
					Sec5IR Exo84IR	-6.03584	7.31072	1.1676	0.98217	0.05	0	-27.7371	15.6654
					Sec6IR control	-40.3897	5.9384	9.61869	9.65711e-09	0.05	1	-58.0174	-22.762
					Sec6IR RalDN	-2.21334	7.27075	0.43051	0.99993	0.05	0	-23.796	19.3693
					Sec6IR Exo84IR	-13.3976	7.16973	2.64265	0.50283	0.05	0	-34.6803	7.88516
					Sec6IR Sec5IR	-7.36175	5.38441	1.93356	0.81881	0.05	0	-23.3449	8.62143
					dStimIR control	-27.9612	7.63968	5.17601	0.00547	0.05	1	-50.639	-5.28341
					dStimIR RalDN	10.2152	8.71573	1.65751	0.90415	0.05	0	-15.6568	36.0871
					dStimIR Exo84IR	-0.9691	8.63164	0.15878	1	0.05	0	-26.5914	24.6532
					dStimIR Sec5IR	5.06675	7.21748	0.99279	0.99241	0.05	0	-16.3578	26.4913
					dStimIR Sec6IR	12.4285	7.07463	2.48445	0.57835	0.05	0	-8.57196	33.429
					Rescue control	-0.4852	6.98138	0.09829	1	0.05	0	-21.2089	20.2385
					Rescue RalDN	37.6912	8.14487	6.5444	0.00011157	0.05	1	13.5138	61.8685
					Rescue Exo84IR	26.5069	8.05482	4.65391	0.01902	0.05	1	2.59682	50.417
					Rescue Sec5IR	32.5427	6.51667	7.06225	2.07035e-05	0.05	1	13.1985	51.8869
					Rescue Sec6IR	39.9045	6.35809	8.87585	3.53637e-08	0.05	1	21.031	58.7779
					Rescue dStimIR	27.476	7.97029	4.87522	0.01142	0.05	1	3.81684	51.1351

## Sheet: Fig. 1-1
A	two tailed unpaired t-test				0.0174613
B	two tailed unpaired t-test				6.22651e-14
C	one-way ANOVA with post hoc Tukey's test				ANOVA	DF	Sum of Squares	Mean Square	F Value	Prob>F
					Model	2	254628	127314	2.32503	0.10203
					Error	124	6790000	54758.1
					Total	126	7044630
D	one-way ANOVA with post hoc Tukey's test				ANOVA	DF	Sum of Squares	Mean Square	F Value	Prob>F
					Model	2	924261	462131	15.935	2.70628e-06
					Error	61	1769060	29001.1
					Total	63	2693330
					Tukey's test
						MeanDiff	SEM	q Value	Prob	Alpha	Sig	LCL	UCL
					Level2 Level1	114.755	52.6145	3.08446	0.08256	0.05	0	-11.6371	241.146
					Level3 Level1	-178.727	51.3465	4.92261	0.00264	0.05	1	-302.073	-55.3817
					Level3 Level2	-293.482	52.6145	7.88844	1.73315e-06	0.05	1	-419.873	-167.09

## Sheet: Fig. 2-1
C	one-way ANOVA with post hoc Tukey's test				ANOVA	DF	Sum of Squares	Mean Square	F Value	Prob>F
					Model	2	1520480000	760239000	6.96899	0.00135
					Error	124	13527000000	109089000
					Total	126	15047500000
						MeanDiff	SEM	q Value	Prob	Alpha	Sig	LCL	UCL
					Level2 Level1	2498.46	2205.95	1.60174	0.49591	0.05	0	-2734.54	7731.46
					Level3 Level1	-5915.44	2399.47	3.48647	0.03968	0.05	1	-11607.5	-223.364
					Level3 Level2	-8413.9	2273.6	5.23358	0.000933497	0.05	1	-13807.4	-3020.43
E	two tailed unpaired t-test			2.21653e-08

## Sheet: Fig. 3-1
A	two tailed unpaired t-test			0.00177065
B	two tailed unpaired t-test			4.63167e-05
C	two tailed unpaired t-test			0.586163
D	two tailed unpaired t-test			0.00060652
E	two tailed unpaired t-test			0.911638
F	two tailed unpaired t-test			0.0349168
G	two tailed unpaired t-test			0.735598

## Sheet: Fig. 4-1
B	two tailed unpaired t-test				0.548518
C	two tailed unpaired t-test				0.329747
E	one-way ANOVA with post hoc Tukey's test				ANOVA	DF	Sum of Squares	Mean Square	F Value	Prob>F
					Model	2	1125.68	562.839	4.12634	0.01757
					Error	195	26598.2	136.401
					Total	197	27723.9
					Tukey's test
						MeanDiff	SEM	q Value	Prob	Alpha	Sig	LCL	UCL
					Level2 Level1	-4.40438	1.9454	3.20178	0.06339	0.05	0	-8.99892	0.19016
					Level3 Level1	-5.35013	2.07902	3.63931	0.029	0.05	1	-10.2603	-0.43999
					Level3 Level2	-0.94575	2.14696	0.62297	0.89863	0.05	0	-6.01633	4.12484
F	one-way ANOVA with post hoc Tukey's test				ANOVA	DF	Sum of Squares	Mean Square	F Value	Prob>F
					Model	2	41558.3	20779.1	13.6556	2.81595e-06
					Error	195	296722	1521.65
					Total	197	338280
					Tukey's test
						MeanDiff	SEM	q Value	Prob	Alpha	Sig	LCL	UCL
					Level2 Level1	-20.6809	6.49766	4.50119	0.00481	0.05	1	-36.0267	-5.33505
					Level3 Level1	-35.5093	6.94397	7.23183	2.23024e-06	0.05	1	-51.9092	-19.1093
					Level3 Level2	-14.8284	7.17089	2.92439	0.09926	0.05	0	-31.7642	2.10747
